# Supplementary material for: Increasing the apparent shear viscosity of polymer composites by uptake of a small amount of water
Source: Royal Society of Chemistry journal article supplement (doi:10.1039/c4ra00541d), 2014-01-01
Supplement: c4ra00541d1.pdf [file c4ra00541d1.pdf]

## Supporting Information

Increasing the apparent shear viscosity of polymer composites by uptake of a small amount of water

Dapeng Wang<sup>1,3</sup>, Xiang Wang<sup>3</sup>, Yuan Yuan<sup>1</sup>, Weihua, Li<sup>2</sup>, Huiwen Tian<sup>2\*</sup>, Shugao Zhao<sup>1\*</sup>

1. *Key Laboratory of Rubber-Plastics of Ministry of Education/Shandong Provincial Key Laboratory of Rubber-plastics, Qingdao University of Science & Technology, Qingdao 266042, PR China*
2. *Key laboratory of Corrosion Science, Shandong, Institute of Oceanology, Chinese Academy of Sciences, Qingdao 266071, PR China*
3. *Department of Chemical and Biological Engineering, University of Colorado Boulder, Boulder, Colorado 80309, United States*

### **2.1. Materials**

Polyamide 6 (PA6) and polyamide 6,10 (PA6,10) powders were obtained commercially from Nanjing Hongrui Plastic Products Co., Ltd. (China) and Shandong Dongchen Engineering Plastic Co. Ltd. (China). The number-average molecular weights of PA6 and PA6,10 were 27.5 and 29.5 kg/mol, respectively. The ferrite particles with density of 5.1 g/cm<sup>3</sup> were obtained from BGRIMM Magnetic Materials & Technology Co., Ltd. (China). Hydroxyl groups are attached on the surface of rough ferrite particles. The silane coupling agent, (Aminoethyl)- $\gamma$ -aminopropyltrimethoxysilane, was purchased from Nanjing Xiangfei Chemical Research Institute (China) and used as received.

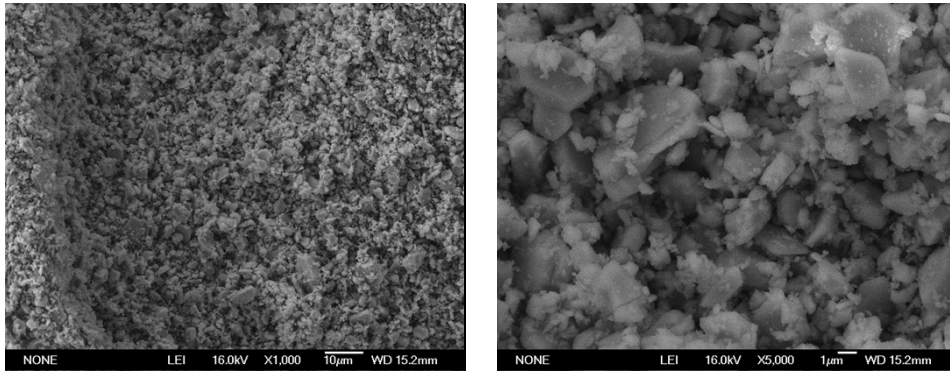

**Figure S1** The SEM picture of rough ferrite particles with magnification of 1000× (left) and 5000× (right).
